# Supplementary material for: Analysis of the Single-Cell Heterogeneity of Adenocarcinoma Cell Lines and the Investigation of Intratumor Heterogeneity Reveals the Expression of Transmembrane Protein 45A (TMEM45A) in Lung Adenocarcinoma Cancer Patients
Source: MDPI journal article supplement (doi:10.3390/cancers14010144), 2021-12-29
Supplement: s1 [file s1]

**Supplementary Table S1.** The STR profile of A549 cells

| <i>Locus</i> | <i>Chromosomal Location</i> | <i>ATCC Marker</i> | <i>Customer Sample Typed Alleles</i> | <i>Database Alleles</i> |
|--------------|-----------------------------|--------------------|--------------------------------------|-------------------------|
| D3S1358      | Chr03                       |                    | 16                                   | 16                      |
| TH01         | Chr11                       | Yes                | 8/9.3                                | 8/9.3                   |
| D21S11       | Chr21                       |                    | 29                                   | 29                      |
| D18S51       | Chr18                       |                    | 14/17                                | 14/17                   |
| Penta_E      | Chr15                       |                    | 7/11                                 | 7/11                    |
| D5S818       | Chr05                       | Yes                | 11                                   | 11                      |
| D13S317      | Chr13                       | Yes                | 11                                   | 11                      |
| D7S820       | Chr07                       | Yes                | 8/11                                 | 8/11                    |
| D16S539      | Chr16                       | Yes                | 11/12                                | 11/12                   |
| CSF1PO       | Chr05                       | Yes                | 10/12                                | 10/12                   |
| Penta_D      | Chr21                       |                    | 9                                    | 9                       |
| AMEL         | X/Y                         | Yes                | X/Y                                  | X/Y                     |
| vWA          | Chr12                       | Yes                | 14                                   | 14                      |
| D8S1179      | Chr08                       |                    | 13/14                                | 13/14                   |
| TPOX         | Chr2                        | Yes                | 8/11                                 | 8/11                    |
| FGA          | Chr04                       |                    | 23                                   | 23                      |

**Supplementary Table S2.** The STR profile of H1975 cells

| <i>Locus</i> | <i>Chromosomal Location</i> | <i>ATCC Marker</i> | <i>Customer Sample Typed Alleles</i> | <i>Database Alleles</i> |
|--------------|-----------------------------|--------------------|--------------------------------------|-------------------------|
| D3S1358      | Chr03                       |                    | 14/15                                | 14/15                   |
| TH01         | Chr11                       | Yes                | 7                                    | 7                       |
| D21S11       | Chr21                       |                    | 28                                   | 28                      |
| D18S51       | Chr18                       |                    | 13                                   | 13                      |
| Penta_E      | Chr15                       |                    | 12/16                                | 12/16                   |
| D5S818       | Chr05                       | Yes                | 11/12                                | 11/12                   |
| D13S317      | Chr13                       | Yes                | 10                                   | 10/13                   |
| D7S820       | Chr07                       | Yes                | 8                                    | 8                       |
| D16S539      | Chr16                       | Yes                | 12                                   | 9/12                    |
| CSF1PO       | Chr05                       | Yes                | 12                                   | 12                      |
| Penta_D      | Chr21                       |                    | 12/13                                | 12/13                   |
| AMEL         | X/Y                         | Yes                | X                                    | X                       |
| vWA          | Chr12                       | Yes                | 18                                   | 18                      |
| D8S1179      | Chr08                       |                    | 13/16                                | 13/16                   |
| TPOX         | Chr2                        | Yes                | 8/11                                 | 8/11                    |
| FGA          | Chr04                       |                    | 21/24                                | 21/24                   |

**Supplementary Table S3.** The STR profile of H1650 cells

| <i>Locus</i> | <i>Chromosomal Location</i> | <i>ATCC Marker</i> | <i>Customer Sample Typed Alleles</i> | <i>Database Alleles</i> |
|--------------|-----------------------------|--------------------|--------------------------------------|-------------------------|
| D3S1358      | Chr03                       |                    | 18                                   | 18                      |
| TH01         | Chr11                       | Yes                | 9.3                                  | 9.3                     |
| D21S11       | Chr21                       |                    | 30                                   | 30                      |
| D18S51       | Chr18                       |                    | 10                                   | 10                      |
| Penta_E      | Chr15                       |                    | 12                                   | 12                      |
| D5S818       | Chr05                       | Yes                | 11                                   | 11                      |
| D13S317      | Chr13                       | Yes                | 11                                   | 11                      |
| D7S820       | Chr07                       | Yes                | 8/9                                  | 8/9                     |
| D16S539      | Chr16                       | Yes                | 11/12                                | 11/12                   |
| CSF1PO       | Chr05                       | Yes                | 11                                   | 11                      |
| Penta_D      | Chr21                       |                    | 8                                    | 8                       |
| AMEL         | X/Y                         | Yes                | X                                    | X                       |
| vWA          | Chr12                       | Yes                | 18                                   | 18                      |
| D8S1179      | Chr08                       |                    | 12                                   | 12                      |
| TPOX         | Chr2                        | Yes                | 11                                   | 11                      |
| FGA          | Chr04                       |                    | 20                                   | 20                      |
